# Supplementary material for: In silico identification of potential SARS COV-2 2′-O-methyltransferase inhibitor: fragment-based screening approach and MM-PBSA calculations
Source: Royal Society of Chemistry journal article supplement (doi:10.1039/d1ra01809d), 2021-01-01
Supplement: d1ra01809d1.pdf [file d1ra01809d1.pdf]

## Supporting Information

### *In silico* Identification of Potential SARS COV-2 2'-O-methyltransferase Inhibitor: Fragment-Based Screening Approach and MM-PBSA Calculations

A.

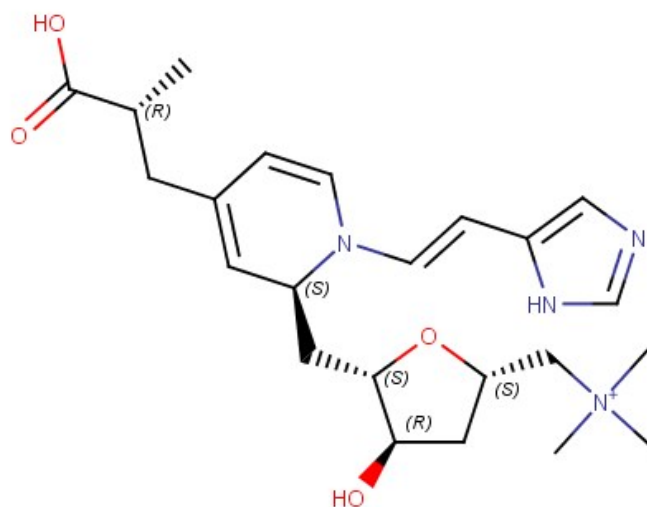

B.

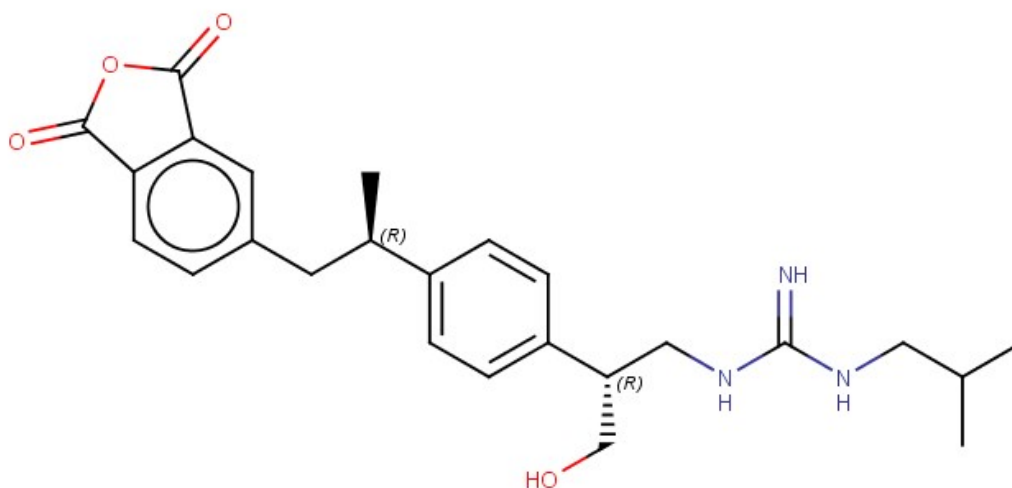

NC(=N)CCc1ccc2c(c1)c3ccccc3c2C(=O)Nc4ccccc4C(=O)Nc5ccccc5C(=O)Nc6ccccc6C(=O)Nc7ccccc7C(=O)Nc8ccccc8C(=O)Nc9ccccc9C(=O)Nc10ccccc10C(=O)Nc11ccccc11C(=O)Nc12ccccc12C(=O)Nc13ccccc13C(=O)Nc14ccccc14C(=O)Nc15ccccc15C(=O)Nc16ccccc16C(=O)Nc17ccccc17C(=O)Nc18ccccc18C(=O)Nc19ccccc19C(=O)Nc20ccccc20C(=O)Nc21ccccc21C(=O)Nc22ccccc22C(=O)Nc23ccccc23C(=O)Nc24ccccc24C(=O)Nc25ccccc25C(=O)Nc26ccccc26C(=O)Nc27ccccc27C(=O)Nc28ccccc28C(=O)Nc29ccccc29C(=O)Nc30ccccc30C(=O)Nc31ccccc31C(=O)Nc32ccccc32C(=O)Nc33ccccc33C(=O)Nc34ccccc34C(=O)Nc35ccccc35C(=O)Nc36ccccc36C(=O)Nc37ccccc37C(=O)Nc38ccccc38C(=O)Nc39ccccc39C(=O)Nc40ccccc40C(=O)Nc41ccccc41C(=O)Nc42ccccc42C(=O)Nc43ccccc43C(=O)Nc44ccccc44C(=O)Nc45ccccc45C(=O)Nc46ccccc46C(=O)Nc47ccccc47C(=O)Nc48ccccc48C(=O)Nc49ccccc49C(=O)Nc50ccccc50C(=O)Nc51ccccc51C(=O)Nc52ccccc52C(=O)Nc53ccccc53C(=O)Nc54ccccc54C(=O)Nc55ccccc55C(=O)Nc56ccccc56C(=O)Nc57ccccc57C(=O)Nc58ccccc58C(=O)Nc59ccccc59C(=O)Nc60ccccc60C(=O)Nc61ccccc61C(=O)Nc62ccccc62C(=O)Nc63ccccc63C(=O)Nc64ccccc64C(=O)Nc65ccccc65C(=O)Nc66ccccc66C(=O)Nc67ccccc67C(=O)Nc68ccccc68C(=O)Nc69ccccc69C(=O)Nc70ccccc70C(=O)Nc71ccccc71C(=O)Nc72ccccc72C(=O)Nc73ccccc73C(=O)Nc74ccccc74C(=O)Nc75ccccc75C(=O)Nc76ccccc76C(=O)Nc77ccccc77C(=O)Nc78ccccc78C(=O)Nc79ccccc79C(=O)Nc80ccccc80C(=O)Nc81ccccc81C(=O)Nc82ccccc82C(=O)Nc83ccccc83C(=O)Nc84ccccc84C(=O)Nc85ccccc85C(=O)Nc86ccccc86C(=O)Nc87ccccc87C(=O)Nc88ccccc88C(=O)Nc89ccccc89C(=O)Nc90ccccc90C(=O)Nc91ccccc91C(=O)Nc92ccccc92C(=O)Nc93ccccc93C(=O)Nc94ccccc94C(=O)Nc95ccccc95C(=O)Nc96ccccc96C(=O)Nc97ccccc97C(=O)Nc98ccccc98C(=O)Nc99ccccc99C(=O)Nc100ccccc100C(=O)Nc101ccccc101C(=O)Nc102ccccc102C(=O)Nc103ccccc103C(=O)Nc104ccccc104C(=O)Nc105ccccc105C(=O)Nc106ccccc106C(=O)Nc107ccccc107C(=O)Nc108ccccc108C(=O)Nc109ccccc109C(=O)Nc110ccccc110C(=O)Nc111ccccc111C(=O)Nc112ccccc112C(=O)Nc113ccccc113C(=O)Nc114ccccc114C(=O)Nc115ccccc115C(=O)Nc116ccccc116C(=O)Nc117ccccc117C(=O)Nc118ccccc118C(=O)Nc119ccccc119C(=O)Nc120ccccc120C(=O)Nc121ccccc121C(=O)Nc122ccccc122C(=O)Nc123ccccc123C(=O)Nc124ccccc124C(=O)Nc125ccccc125C(=O)Nc126ccccc126C(=O)Nc127ccccc127C(=O)Nc128ccccc128C(=O)Nc129ccccc129C(=O)Nc130ccccc130C(=O)Nc131ccccc131C(=O)Nc132ccccc132C(=O)Nc133ccccc133C(=O)Nc134ccccc134C(=O)Nc135ccccc135C(=O)Nc136ccccc136C(=O)Nc137ccccc137C(=O)Nc138ccccc138C(=O)Nc139ccccc139C(=O)Nc140ccccc140C(=O)Nc141ccccc141C(=O)Nc142ccccc142C(=O)Nc143ccccc143C(=O)Nc144ccccc144C(=O)Nc145ccccc145C(=O)Nc146ccccc146C(=O)Nc147ccccc147C(=O)Nc148ccccc148C(=O)Nc149ccccc149C(=O)Nc150ccccc150C(=O)Nc151ccccc151C(=O)Nc152ccccc152C(=O)Nc153ccccc153C(=O)Nc154ccccc154C(=O)Nc155ccccc155C(=O)Nc156ccccc156C(=O)Nc157ccccc157C(=O)Nc158ccccc158C(=O)Nc159ccccc159C(=O)Nc160ccccc160C(=O)Nc161ccccc161C(=O)Nc162ccccc162C(=O)Nc163ccccc163C(=O)Nc164ccccc164C(=O)Nc165ccccc165C(=O)Nc166ccccc166C(=O)Nc167ccccc167C(=O)Nc168ccccc168C(=O)Nc169ccccc169C(=O)Nc170ccccc170C(=O)Nc171ccccc171C(=O)Nc172ccccc172C(=O)Nc173ccccc173C(=O)Nc174ccccc174C(=O)Nc175ccccc175C(=O)Nc176ccccc176C(=O)Nc177ccccc177C(=O)Nc178ccccc178C(=O)Nc179ccccc179C(=O)Nc180ccccc180C(=O)Nc181ccccc181C(=O)Nc182ccccc182C(=O)Nc183ccccc183C(=O)Nc184ccccc184C(=O)Nc185ccccc185C(=O)Nc186ccccc186C(=O)Nc187ccccc187C(=O)Nc188ccccc188C(=O)Nc189ccccc189C(=O)Nc190ccccc190C(=O)Nc191ccccc191C(=O)Nc192ccccc192C(=O)Nc193ccccc193C(=O)Nc194ccccc194C(=O)Nc195ccccc195C(=O)Nc196ccccc196C(=O)Nc197ccccc197C(=O)Nc198ccccc198C(=O)Nc199ccccc199C(=O)Nc200ccccc200C(=O)Nc201ccccc201C(=O)Nc202ccccc202C(=O)Nc203ccccc203C(=O)Nc204ccccc204C(=O)Nc205ccccc205C(=O)Nc206ccccc206C(=O)Nc207ccccc207C(=O)Nc208ccccc208C(=O)Nc209ccccc209C(=O)Nc210ccccc210C(=O)Nc211ccccc211C(=O)Nc212ccccc212C(=O)Nc213ccccc213C(=O)Nc214ccccc214C(=O)Nc215ccccc215C(=O)Nc216ccccc216C(=O)Nc217ccccc217C(=O)Nc218ccccc218C(=O)Nc219ccccc219C(=O)Nc220ccccc220C(=O)Nc221ccccc221C(=O)Nc222ccccc222C(=O)Nc223ccccc223C(=O)Nc224ccccc224C(=O)Nc225ccccc225C(=O)Nc226ccccc226C(=O)Nc227ccccc227C(=O)Nc228ccccc228C(=O)Nc229ccccc229C(=O)Nc230ccccc230C(=O)Nc231ccccc231C(=O)Nc232ccccc232C(=O)Nc233ccccc233C(=O)Nc234ccccc234C(=O)Nc235ccccc235C(=O)Nc236ccccc236C(=O)Nc237ccccc237C(=O)Nc238ccccc238C(=O)Nc239ccccc239C(=O)Nc240ccccc240C(=O)Nc241ccccc241C(=O)Nc242ccccc242C(=O)Nc243ccccc243C(=O)Nc244ccccc244C(=O)Nc245ccccc245C(=O)Nc246ccccc246C(=O)Nc247ccccc247C(=O)Nc248ccccc248C(=O)Nc249ccccc249C(=O)Nc250ccccc250C(=O)Nc251ccccc251C(=O)Nc252ccccc252C(=O)Nc253ccccc253C(=O)Nc254ccccc254C(=O)Nc255ccccc255C(=O)Nc256ccccc256C(=O)Nc257ccccc257C(=O)Nc258ccccc258C(=O)Nc259ccccc259C(=O)Nc260ccccc260C(=O)Nc261ccccc261C(=O)Nc262ccccc262C(=O)Nc263ccccc263C(=O)Nc264ccccc264C(=O)Nc265ccccc265C(=O)Nc266ccccc266C(=O)Nc267ccccc267C(=O)Nc268ccccc268C(=O)Nc269ccccc269C(=O)Nc270ccccc270C(=O)Nc271ccccc271C(=O)Nc272ccccc272C(=O)Nc273ccccc273C(=O)Nc274ccccc274C(=O)Nc275ccccc275C(=O)Nc276ccccc276C(=O)Nc277ccccc277C(=O)Nc278ccccc278C(=O)Nc279ccccc279C(=O)Nc280ccccc280C(=O)Nc281ccccc281C(=O)Nc282ccccc282C(=O)Nc283ccccc283C(=O)Nc284ccccc284C(=O)Nc285ccccc285C(=O)Nc286ccccc286C(=O)Nc287ccccc287C(=O)Nc288ccccc288C(

The chemical structure shows the active site of the enzyme. A benzyl derivative is bound to the active site, forming a covalent intermediate. The structure includes a benzyl group, a hydroxyl group, and a pyrazole ring. The stereochemistry is indicated with (R) and (S) labels.

2

A.

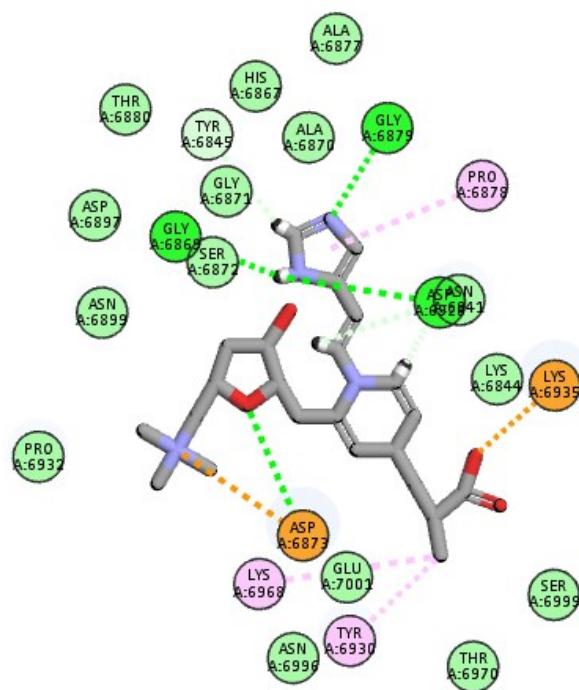

B.

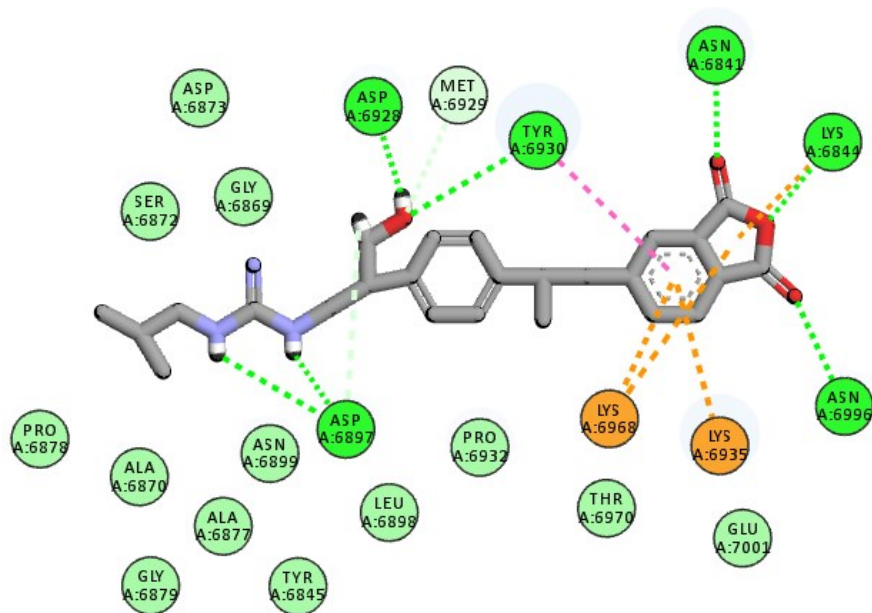

C.

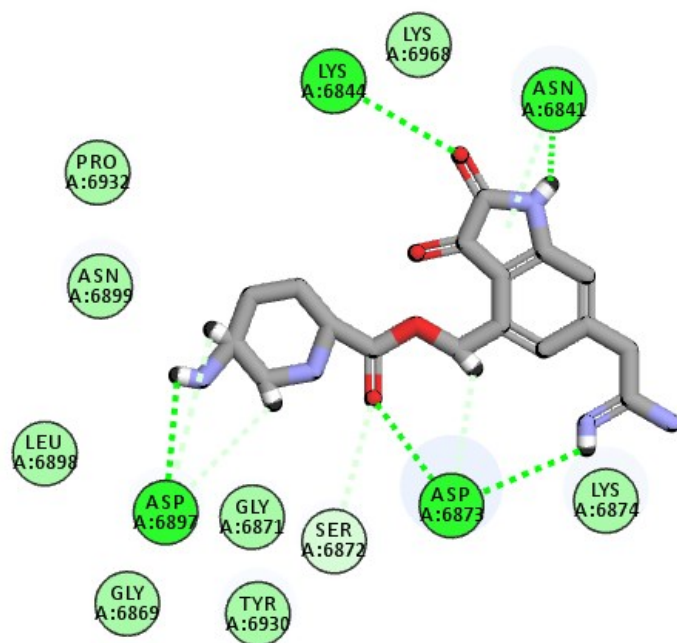

D.

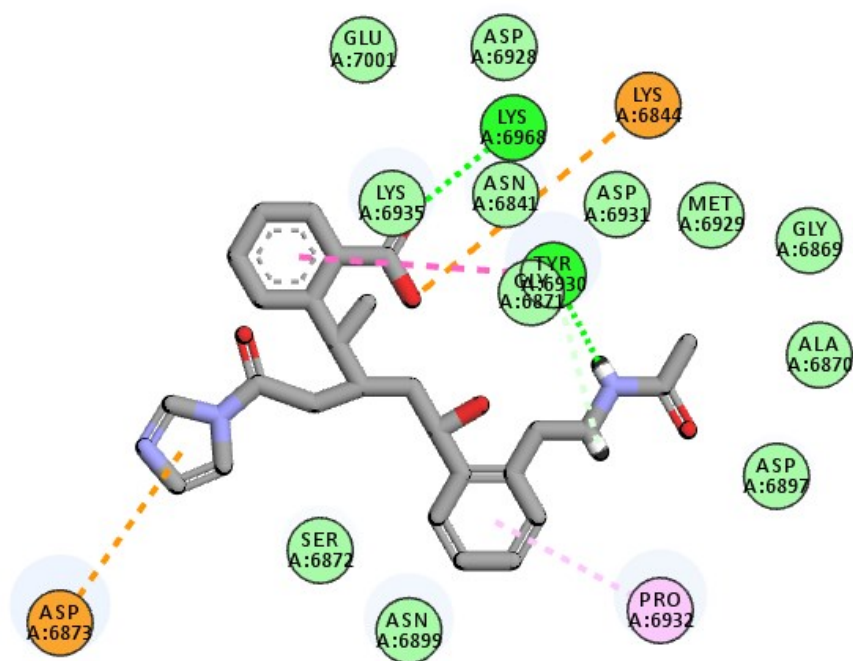

E.

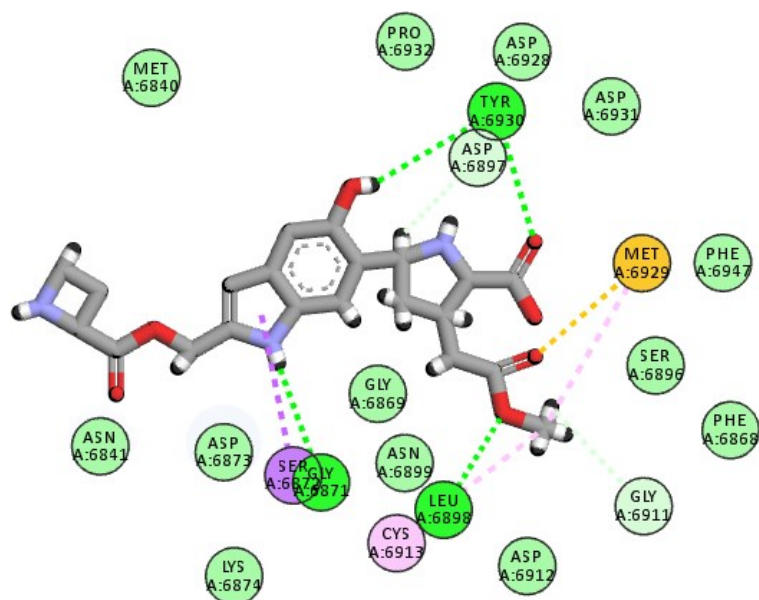

**Figure S2.** 2D interactions diagram for compounds (A) W-1 (B) W-2 (C) W-3 (D) W-4 and (E) W-5.

**The protocol used for conducting the docking study:**

receptor = 6wkq.pdbqt

ligand = AP-20.pdbqt

out= AP-20 out.pdbqt

center\_x= 83

center\_y= 13

center\_z= -0.5

size\_x= 22

size\_y= 22

size\_z= 22

exhaustiveness= 64

**Table S1. Physico-chemical properties and medicinal chemistry friendliness of AP-20**

|                            |     |
|----------------------------|-----|
| <b>GIA</b>                 | Low |
| <b>BBB</b>                 | No  |
| <b>P-gP substrate</b>      | Yes |
| <b>CYP1A2 inhibitor</b>    | No  |
| <b>CYP2C19 inhibitor</b>   | No  |
| <b>CYP2C9 inhibitor</b>    | No  |
| <b>CYP2D6 inhibitor</b>    | No  |
| <b>CYP3A4 inhibitor</b>    | No  |
| <b>PAINS Alerts</b>        | 0   |
| <b>Egan violations</b>     | 1   |
| <b>Lipinski Violations</b> | 3   |
